# Supplementary material
Source: PubMed Central journal article supplement (PMC3523124)
Supplement: NIHMS420448-supplement-01.pdf [file NIHMS420448-supplement-01.pdf]

**Table S1. Characteristics of HAART-Treated Patients Tested for Reactivation of Latent HIV, Related to Figure 4**

| <b>Patients</b> | <b>Age</b> | <b>Sex</b> | <b>Undetectable VL (wks)</b> | <b>CD4 Count</b> | <b>Peak VL</b> |
|-----------------|------------|------------|------------------------------|------------------|----------------|
| Donor 1         | 36         | M          | 149                          | 1260             | 131000         |
| Donor 2         | 52         | M          | 245                          | 698              | 75700          |
| Donor 3         | 32         | M          | 102                          | 622              | 149000         |
| Donor 4         | 44         | M          | 178                          | 235              | 516000         |
| Donor 5         | 49         | M          | 306                          | 1030             | 300000         |
| Donor 6         | 54         | M          | 142                          | 724              | 13969          |
| Donor 7         | 59         | F          | 197                          | 669              | 240000         |
| Donor 8         | 64         | M          | 785                          | 1027             | 750000         |
| Donor 9         | 51         | M          | 433                          | 503              | 189000         |
| Donor 10        | 55         | F          | 357                          | 686              | 177000         |
| Donor 11        | 44         | M          | 98                           | 724              | 163000         |
| Donor 12        | 50         | M          | 91                           | 554              | 111000         |
| Donor 13        | 34         | M          | 226                          | 511              | 147000         |
| Donor 14        | 51         | F          | 191                          | 824              | 553000         |
| Donor 15        | 46         | M          | 610                          | 1228             | 72000          |
| Donor 16        | 48         | M          | 225                          | 595              | 750000         |
| Donor 17        | 48         | M          | 416                          | 1030             | 109000         |
| Donor 18        | 59         | F          | 390                          | 924              | 207000         |
| Donor 19        | 51         | M          | 356                          | 655              | 750000         |

**Table S2. Responses of Donors' Cells from Table S1 to the Indicated Compounds on the Indicated Days Post Treatment, Related to Figure 4**

| Patient        | Day       | DMS<br>O | JQ1  | Prost      | Prost+JQ<br>1 | SAHA       | SAHA+JQ<br>1 | PHA        | PHA+JQ1 |
|----------------|-----------|----------|------|------------|---------------|------------|--------------|------------|---------|
| <b>Donor 1</b> | <b>7</b>  | 1.74     | 1.74 | 3.77       | 1.74          | 1.74       | 1.74         | 1.88       | 2.03    |
|                | <b>14</b> | 1.4      | 1.93 | 3.51       | 3.16          | 1.75       | 1.75         | 0.7        | 29.82   |
|                | <b>21</b> | 1.22     | 1.22 | 2.91       | 101.69        | 1.35       | 5.54         | 2.5        | 234.19  |
| <b>Donor 2</b> | <b>7</b>  | 1.29     | 1.18 | 1.29       | 1.65          | 11.29      | 0.94         | 0          | 1.29    |
|                | <b>14</b> | 1.75     | 1.75 | 0          | 4.04          | 46.32      | 2.46         | 0          | 1.93    |
|                | <b>21</b> | 0.88     | 0.88 | 2.27       | 30.5          | 175.3      | 4.75         | 1.44       | 1.16    |
| <b>Donor 3</b> | <b>7</b>  | 1.65     | 1.41 | 1.53       | 133.06        | 2.71       | 1.06         | 91.65      | 1.41    |
|                | <b>14</b> | 1.93     | 1.93 | 1.05       | 588.07        | 4.74       | 0.88         | 694.5<br>6 | 1.4     |
|                | <b>21</b> | 1.69     | 1.28 | 1.08       | 292.09        | 8.04       | 1.42         | 289.2<br>6 | 1.28    |
| <b>Donor 4</b> | <b>7</b>  | 3.48     | 1.59 | 6.23       | 1.59          | 1.74       | 1.45         | 0.87       | 1.59    |
|                | <b>14</b> | 3.16     | 1.4  | 15.44      | 16.84         | 1.58       | 1.4          | 1.58       | 1.23    |
|                | <b>21</b> | 2.77     | 1.22 | 17.57      | 44.53         | 1.28       | 1.22         | 1.15       | 1.22    |
| <b>Donor 5</b> | <b>7</b>  | 1.41     | 1.18 | 5.29       | 10.82         | 1.53       | 1.29         | 1.29       | 1.65    |
|                | <b>14</b> | 0.88     | 0.88 | 136.8<br>4 | 221.05        | 511.5<br>8 | 1.75         | 1.58       | 1.23    |
|                | <b>21</b> | 0.88     | 7.24 | 224.8<br>6 | 236.57        | 240.9<br>4 | 1.38         | 1.05       | 1.05    |
| <b>Donor 6</b> | <b>7</b>  | 2.03     | 1.45 | 5.51       | 2.03          | 1.59       | 1.3          | 1.3        | 1.16    |
|                | <b>14</b> | 1.93     | 1.58 | 81.93      | 14.91         | 1.75       | 1.75         | 1.75       | 1.75    |
|                | <b>21</b> | 1.49     | 0.88 | 227.7<br>3 | 81            | 1.05       | 1.22         | 1.1        | 1.27    |
| <b>Donor 7</b> | <b>7</b>  | 1.18     | 1.29 | 15.29      | 5.06          | 1.41       | 1.29         | 1.41       | 1.29    |
|                | <b>14</b> | 1.75     | 1.75 | 822.1<br>1 | 386.67        | 1.93       | 1.75         | 1.93       | 2.11    |
|                | <b>21</b> | 0.88     | 0.99 | 249.6<br>7 | 247.62        | 15.36      | 1.77         | 1.55       | 1.55    |
| <b>Donor 8</b> | <b>7</b>  | 1.74     | 1.59 | 16.09      | 1.59          | 1.45       | 1.88         | 1.3        | 1.3     |

| Patient         | Day | DMS<br>O | JQ1  | Prost      | Prost+JQ<br>1 | SAHA | SAHA+JQ<br>1 | PHA        | PHA+JQ1 |
|-----------------|-----|----------|------|------------|---------------|------|--------------|------------|---------|
|                 | 14  | 0.88     | 1.4  | 806.4<br>9 | 1.75          | 1.58 | 1.23         | 1.4        | 1.4     |
|                 | 21  | 2.98     | 2.71 | 241.6<br>6 | 18.78         | 1.66 | 1.16         | 1.44       | 1.66    |
| <b>Donor 9</b>  | 7   | 1.18     | 1.29 | 1.88       | 1.29          | 1.18 | 1.29         | 0          | 1.53    |
|                 | 14  | 0.88     | 2.11 | 107.5<br>4 | 1.93          | 1.4  | 1.58         | 1.75       | 104.04  |
|                 | 21  | 1.01     | 1.22 | 276.1<br>5 | 1.42          | 1.22 | 1.28         | 1.76       | 290.47  |
| <b>Donor 10</b> | 7   | 1.29     | 1.29 | 7.65       | 1.41          | 1.41 | 1.29         | 7.41       | 6.47    |
|                 | 14  | 1.29     | 1.58 | 738.7<br>7 | 1.75          | 1.75 | 2.11         | 338.4<br>2 | 744.56  |
|                 | 21  | 1.29     | 1.88 | 234.2<br>5 | 10            | 1.22 | 1.05         | 228.7<br>8 | 229.45  |
| <b>Donor 11</b> | 7   | 1.74     | 1.59 | 2.17       | 2.46          | 1.74 | 2.75         | 1.74       | 20.58   |
|                 | 14  | 0.53     | 0.18 | 2.28       | 1.58          | 1.58 | 2.28         | 0          | 754.56  |
|                 | 21  | 1.01     | 1.15 | 2.09       | 1.22          | 1.15 | 2.16         | 1.22       | 268.99  |
| <b>Donor 12</b> | 7   | 0.99     | 1.29 | 1.76       | 1.41          | 1.29 | 1.41         | 1.65       | 1.29    |
|                 | 14  | 2.11     | 1.58 | 2.63       | 2.11          | 1.4  | 2.28         | 229.1<br>2 | 1.75    |
|                 | 21  | 0.99     | 0.99 | 1.6        | 1.22          | 1.27 | 1.1          | 228.7<br>3 | 1.44    |
| <b>Donor 13</b> | 7   | 1.29     | 1.41 | 1.41       | 1.41          | 1.29 | 1.53         | 1.41       | 1.29    |
|                 | 14  | 1.58     | 1.93 | 1.75       | 1.58          | 1.75 | 1.75         | 1.75       | 1.58    |
|                 | 21  | 1.6      | 1.77 | 6.35       | 3.54          | 1.16 | 2.71         | 1.49       | 11.16   |
| <b>Donor 14</b> | 7   | 1.59     | 1.59 | 1.59       | 1.59          | 1.45 | 1.59         | 1.59       | 1.45    |
|                 | 14  | 1.58     | 1.75 | 1.4        | 1.93          | 1.58 | 1.4          | 0.7        | 1.58    |
|                 | 21  | 0.83     | 0.94 | 0.94       | 0.99          | 1.05 | 0.99         | 2.04       | 1.05    |

| Patient             | Day       | DMS<br>O | JQ1  | Prost | Prost+JQ<br>1 | SAHA | SAHA+JQ<br>1 | PHA  | PHA+JQ1 |
|---------------------|-----------|----------|------|-------|---------------|------|--------------|------|---------|
| <b>Donor<br/>15</b> | <b>7</b>  | 1.74     | 1.45 | 1.59  | 1.59          | 1.59 | 1.45         | 1.59 | 1.45    |
|                     | <b>14</b> | 1.4      | 1.4  | 1.93  | 0.88          | 1.75 | 0.7          | 0    | 0       |
|                     | <b>21</b> | 1.08     | 1.22 | 1.15  | 1.22          | 1.22 | 1.15         | 1.22 | 1.28    |
| <b>Donor<br/>16</b> | <b>7</b>  | 1.59     | 1.45 | 1.45  | 1.59          | 1.59 | 1.59         | 1.59 | 1.3     |
|                     | <b>14</b> | 3.68     | 1.75 | 1.75  | 1.75          | 1.58 | 1.75         | 1.75 | 1.58    |
|                     | <b>21</b> | 2.57     | 1.28 | 1.28  | 1.35          | 1.35 | 2.57         | 1.62 | 1.55    |
| <b>Donor<br/>17</b> | <b>7</b>  | 1.74     | 2.17 | 2.03  | 1.88          | 1.88 | 1.74         | 1.59 | 1.88    |
|                     | <b>14</b> | 1.4      | 2.46 | 1.58  | 0.53          | 0    | 1.23         | 1.23 | 1.4     |
|                     | <b>21</b> | 1.01     | 2.16 | 1.15  | 1.15          | 1.15 | 1.15         | 1.22 | 1.28    |
| <b>Donor<br/>18</b> | <b>7</b>  | 1.29     | 1.76 | 1.65  | 1.53          | 1.76 | 1.29         | 1.29 | 1.29    |
|                     | <b>14</b> | 1.93     | 0    | 2.63  | 2.11          | 2.11 | 2.11         | 2.11 | 1.93    |
|                     | <b>21</b> | 1.05     | 2.1  | 1.44  | 1.49          | 1.77 | 1.6          | 6.08 | 1.44    |
| <b>Donor<br/>19</b> | <b>7</b>  | 1.53     | 1.65 | 1.41  | 2             | 1.53 | 1.41         | 1.41 | 1.29    |
|                     | <b>14</b> | 1.4      | 1.4  | 1.58  | 1.75          | 1.4  | 1.4          | 1.75 | 1.23    |
|                     | <b>21</b> | 1.55     | 1.08 | 1.15  | 1.42          | 1.22 | 2.7          | 1.28 | 1.49    |
