# Supplementary material
Source: PubMed Central journal article supplement (PMC3523124)
Supplement: NIHMS420448-supplement-03.pdf [file NIHMS420448-supplement-03.pdf]

**Table S1. Characteristics of HAART-treated patients tested for reactivation of latent HIV. Related to Fig. 4**

| <b>Patients</b> | <b>Age</b> | <b>Sex</b> | <b>Undetectable VL (wks)</b> | <b>CD4 Count</b> | <b>Peak VL</b> |
|-----------------|------------|------------|------------------------------|------------------|----------------|
| Donor 1         | 36         | M          | 149                          | 1260             | 131000         |
| Donor 2         | 52         | M          | 245                          | 698              | 75700          |
| Donor 3         | 32         | M          | 102                          | 622              | 149000         |
| Donor 4         | 44         | M          | 178                          | 235              | 516000         |
| Donor 5         | 49         | M          | 306                          | 1030             | 300000         |
| Donor 6         | 54         | M          | 142                          | 724              | 13969          |
| Donor 7         | 59         | F          | 197                          | 669              | 240000         |
| Donor 8         | 64         | M          | 785                          | 1027             | 750000         |
| Donor 9         | 51         | M          | 433                          | 503              | 189000         |
| Donor 10        | 55         | F          | 357                          | 686              | 177000         |
| Donor 11        | 44         | M          | 98                           | 724              | 163000         |
| Donor 12        | 50         | M          | 91                           | 554              | 111000         |
| Donor 13        | 34         | M          | 226                          | 511              | 147000         |
| Donor 14        | 51         | F          | 191                          | 824              | 553000         |
| Donor 15        | 46         | M          | 610                          | 1228             | 72000          |
| Donor 16        | 48         | M          | 225                          | 595              | 750000         |
| Donor 17        | 48         | M          | 416                          | 1030             | 109000         |
| Donor 18        | 59         | F          | 390                          | 924              | 207000         |
| Donor 19        | 51         | M          | 356                          | 655              | 750000         |

**Table S2. Responses of Donors' cells from Supplementary Table S1 to the indicated compounds on the indicated days post infection. Related to Fig. 4.**

| Patient        | Day       | DMSO | JQ1  | Prost  | Prost+JQ1 | SAHA   | SAHA+JQ1 | PHA    | PHA+JQ1 |
|----------------|-----------|------|------|--------|-----------|--------|----------|--------|---------|
| <b>Donor 1</b> | <b>7</b>  | 1.74 | 1.74 | 3.77   | 1.74      | 1.74   | 1.74     | 1.88   | 2.03    |
|                | <b>14</b> | 1.4  | 1.93 | 3.51   | 3.16      | 1.75   | 1.75     | 0.7    | 29.82   |
|                | <b>21</b> | 1.22 | 1.22 | 2.91   | 101.69    | 1.35   | 5.54     | 2.5    | 234.19  |
| <b>Donor 2</b> | <b>7</b>  | 1.29 | 1.18 | 1.29   | 1.65      | 11.29  | 0.94     | 0      | 1.29    |
|                | <b>14</b> | 1.75 | 1.75 | 0      | 4.04      | 46.32  | 2.46     | 0      | 1.93    |
|                | <b>21</b> | 0.88 | 0.88 | 2.27   | 30.5      | 175.3  | 4.75     | 1.44   | 1.16    |
| <b>Donor 3</b> | <b>7</b>  | 1.65 | 1.41 | 1.53   | 133.06    | 2.71   | 1.06     | 91.65  | 1.41    |
|                | <b>14</b> | 1.93 | 1.93 | 1.05   | 588.07    | 4.74   | 0.88     | 694.56 | 1.4     |
|                | <b>21</b> | 1.69 | 1.28 | 1.08   | 292.09    | 8.04   | 1.42     | 289.26 | 1.28    |
| <b>Donor 4</b> | <b>7</b>  | 3.48 | 1.59 | 6.23   | 1.59      | 1.74   | 1.45     | 0.87   | 1.59    |
|                | <b>14</b> | 3.16 | 1.4  | 15.44  | 16.84     | 1.58   | 1.4      | 1.58   | 1.23    |
|                | <b>21</b> | 2.77 | 1.22 | 17.57  | 44.53     | 1.28   | 1.22     | 1.15   | 1.22    |
| <b>Donor 5</b> | <b>7</b>  | 1.41 | 1.18 | 5.29   | 10.82     | 1.53   | 1.29     | 1.29   | 1.65    |
|                | <b>14</b> | 0.88 | 0.88 | 136.84 | 221.05    | 511.58 | 1.75     | 1.58   | 1.23    |
|                | <b>21</b> | 0.88 | 7.24 | 224.86 | 236.57    | 240.94 | 1.38     | 1.05   | 1.05    |
| <b>Donor 6</b> | <b>7</b>  | 2.03 | 1.45 | 5.51   | 2.03      | 1.59   | 1.3      | 1.3    | 1.16    |
|                | <b>14</b> | 1.93 | 1.58 | 81.93  | 14.91     | 1.75   | 1.75     | 1.75   | 1.75    |
|                | <b>21</b> | 1.49 | 0.88 | 227.73 | 81        | 1.05   | 1.22     | 1.1    | 1.27    |
| <b>Donor 7</b> | <b>7</b>  | 1.18 | 1.29 | 15.29  | 5.06      | 1.41   | 1.29     | 1.41   | 1.29    |
|                | <b>14</b> | 1.75 | 1.75 | 822.11 | 386.67    | 1.93   | 1.75     | 1.93   | 2.11    |
|                | <b>21</b> | 0.88 | 0.99 | 249.67 | 247.62    | 15.36  | 1.77     | 1.55   | 1.55    |
| <b>Donor 8</b> | <b>7</b>  | 1.74 | 1.59 | 16.09  | 1.59      | 1.45   | 1.88     | 1.3    | 1.3     |
|                | <b>14</b> | 0.88 | 1.4  | 806.49 | 1.75      | 1.58   | 1.23     | 1.4    | 1.4     |
|                | <b>21</b> | 2.98 | 2.71 | 241.66 | 18.78     | 1.66   | 1.16     | 1.44   | 1.66    |
| <b>Donor 9</b> | <b>7</b>  | 1.18 | 1.29 | 1.88   | 1.29      | 1.18   | 1.29     | 0      | 1.53    |
|                | <b>14</b> | 0.88 | 2.11 | 107.54 | 1.93      | 1.4    | 1.58     | 1.75   | 104.04  |
|                | <b>21</b> | 1.01 | 1.22 | 276.15 | 1.42      | 1.22   | 1.28     | 1.76   | 290.47  |

|                 |           |      |      |        |      |      |      |        |        |
|-----------------|-----------|------|------|--------|------|------|------|--------|--------|
| <b>Donor 10</b> | <b>7</b>  | 1.29 | 1.29 | 7.65   | 1.41 | 1.41 | 1.29 | 7.41   | 6.47   |
|                 | <b>14</b> | 1.29 | 1.58 | 738.77 | 1.75 | 1.75 | 2.11 | 338.42 | 744.56 |
|                 | <b>21</b> | 1.29 | 1.88 | 234.25 | 10   | 1.22 | 1.05 | 228.78 | 229.45 |
| <b>Donor 11</b> | <b>7</b>  | 1.74 | 1.59 | 2.17   | 2.46 | 1.74 | 2.75 | 1.74   | 20.58  |
|                 | <b>14</b> | 0.53 | 0.18 | 2.28   | 1.58 | 1.58 | 2.28 | 0      | 754.56 |
|                 | <b>21</b> | 1.01 | 1.15 | 2.09   | 1.22 | 1.15 | 2.16 | 1.22   | 268.99 |
| <b>Donor 12</b> | <b>7</b>  | 0.99 | 1.29 | 1.76   | 1.41 | 1.29 | 1.41 | 1.65   | 1.29   |
|                 | <b>14</b> | 2.11 | 1.58 | 2.63   | 2.11 | 1.4  | 2.28 | 229.12 | 1.75   |
|                 | <b>21</b> | 0.99 | 0.99 | 1.6    | 1.22 | 1.27 | 1.1  | 228.73 | 1.44   |
| <b>Donor 13</b> | <b>7</b>  | 1.29 | 1.41 | 1.41   | 1.41 | 1.29 | 1.53 | 1.41   | 1.29   |
|                 | <b>14</b> | 1.58 | 1.93 | 1.75   | 1.58 | 1.75 | 1.75 | 1.75   | 1.58   |
|                 | <b>21</b> | 1.6  | 1.77 | 6.35   | 3.54 | 1.16 | 2.71 | 1.49   | 11.16  |
| <b>Donor 14</b> | <b>7</b>  | 1.59 | 1.59 | 1.59   | 1.59 | 1.45 | 1.59 | 1.59   | 1.45   |
|                 | <b>14</b> | 1.58 | 1.75 | 1.4    | 1.93 | 1.58 | 1.4  | 0.7    | 1.58   |
|                 | <b>21</b> | 0.83 | 0.94 | 0.94   | 0.99 | 1.05 | 0.99 | 2.04   | 1.05   |
| <b>Donor 15</b> | <b>7</b>  | 1.74 | 1.45 | 1.59   | 1.59 | 1.59 | 1.45 | 1.59   | 1.45   |
|                 | <b>14</b> | 1.4  | 1.4  | 1.93   | 0.88 | 1.75 | 0.7  | 0      | 0      |
|                 | <b>21</b> | 1.08 | 1.22 | 1.15   | 1.22 | 1.22 | 1.15 | 1.22   | 1.28   |
| <b>Donor 16</b> | <b>7</b>  | 1.59 | 1.45 | 1.45   | 1.59 | 1.59 | 1.59 | 1.59   | 1.3    |
|                 | <b>14</b> | 3.68 | 1.75 | 1.75   | 1.75 | 1.58 | 1.75 | 1.75   | 1.58   |
|                 | <b>21</b> | 2.57 | 1.28 | 1.28   | 1.35 | 1.35 | 2.57 | 1.62   | 1.55   |
| <b>Donor 17</b> | <b>7</b>  | 1.74 | 2.17 | 2.03   | 1.88 | 1.88 | 1.74 | 1.59   | 1.88   |
|                 | <b>14</b> | 1.4  | 2.46 | 1.58   | 0.53 | 0    | 1.23 | 1.23   | 1.4    |
|                 | <b>21</b> | 1.01 | 2.16 | 1.15   | 1.15 | 1.15 | 1.15 | 1.22   | 1.28   |
| <b>Donor 18</b> | <b>7</b>  | 1.29 | 1.76 | 1.65   | 1.53 | 1.76 | 1.29 | 1.29   | 1.29   |
|                 | <b>14</b> | 1.93 | 0    | 2.63   | 2.11 | 2.11 | 2.11 | 2.11   | 1.93   |
|                 | <b>21</b> | 1.05 | 2.1  | 1.44   | 1.49 | 1.77 | 1.6  | 6.08   | 1.44   |
| <b>Donor 19</b> | <b>7</b>  | 1.53 | 1.65 | 1.41   | 2    | 1.53 | 1.41 | 1.41   | 1.29   |
|                 | <b>14</b> | 1.4  | 1.4  | 1.58   | 1.75 | 1.4  | 1.4  | 1.75   | 1.23   |
|                 | <b>21</b> | 1.55 | 1.08 | 1.15   | 1.42 | 1.22 | 2.7  | 1.28   | 1.49   |
