# Supplementary material
Source: PubMed Central journal article supplement (PMC3523124)

Figure S1

A

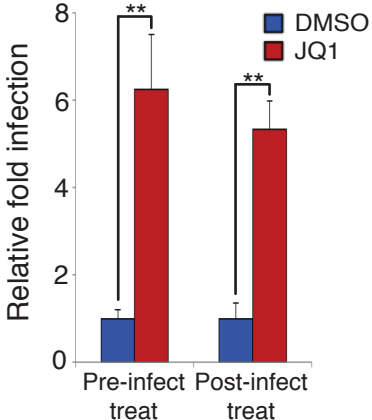

B

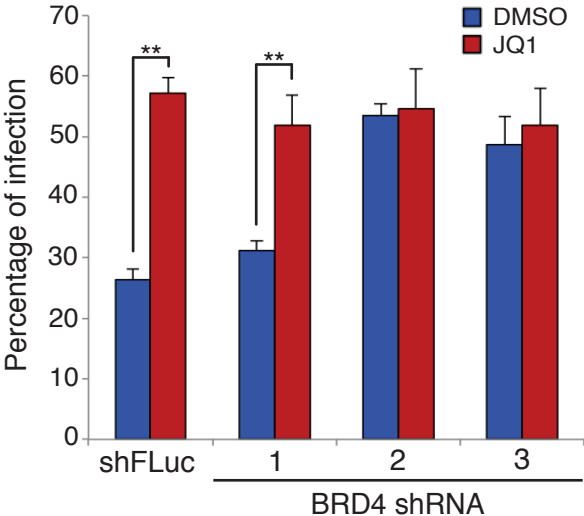

Supplement: NIHMS420448-supplement-04.pdf [file NIHMS420448-supplement-04.pdf]

Figure S2

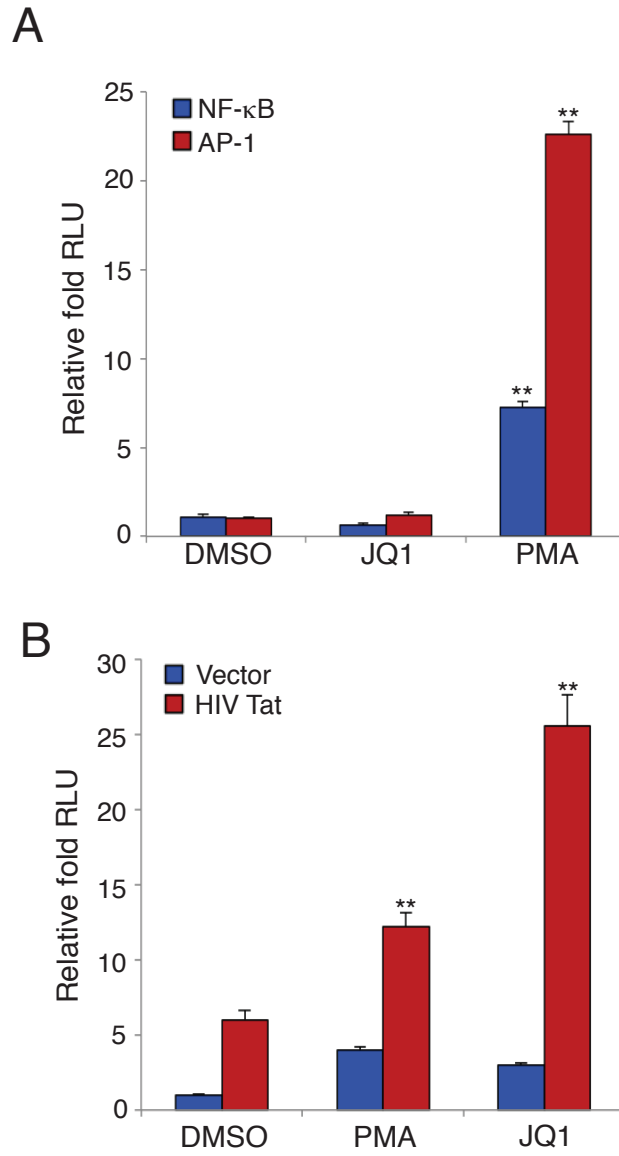

Supplement: NIHMS420448-supplement-05.pdf [file NIHMS420448-supplement-05.pdf]

Figure S3

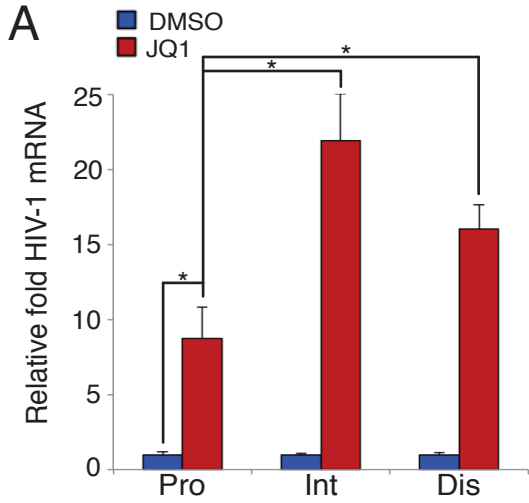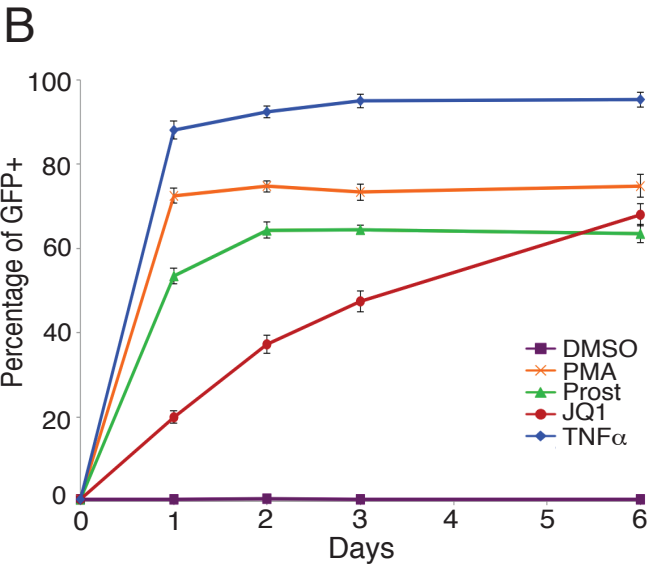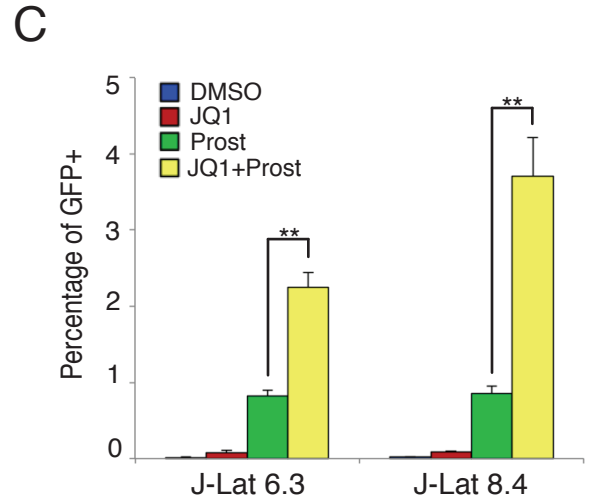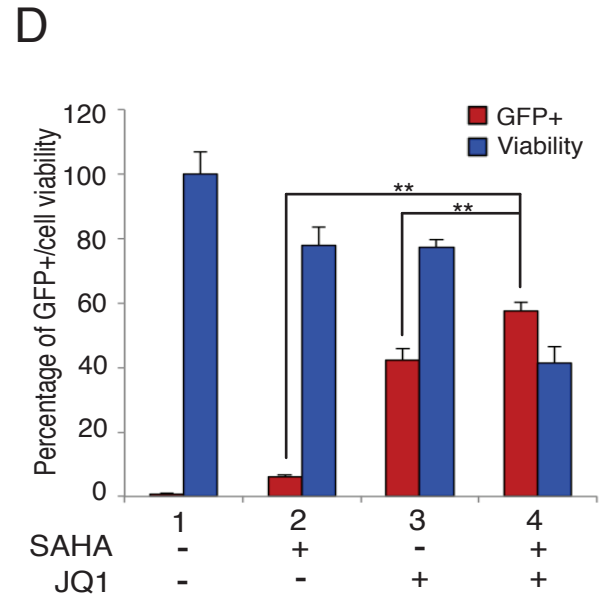

Supplement: NIHMS420448-supplement-06.pdf [file NIHMS420448-supplement-06.pdf]

Figure S4

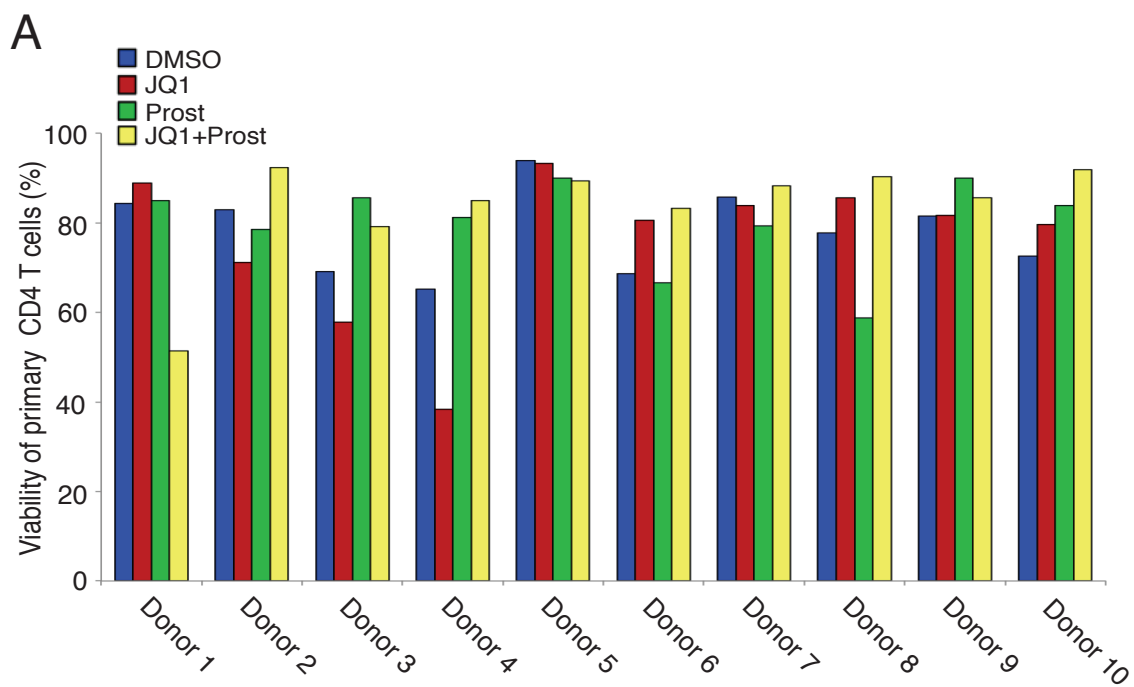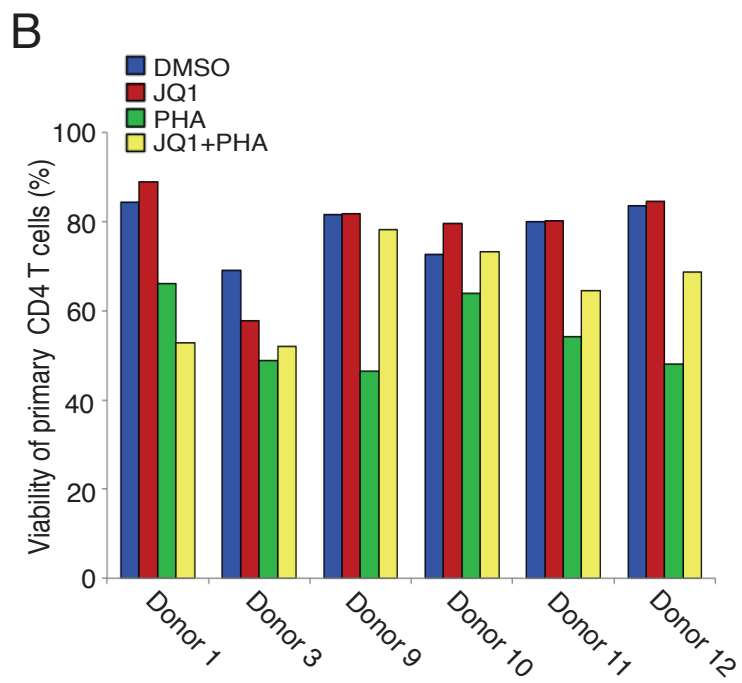

Supplement: NIHMS420448-supplement-07.pdf [file NIHMS420448-supplement-07.pdf]
